# Supplementary material
Source: publisher site journal article supplement (https://www.dovepress.com/article/528992)
Supplement: Supplementary file 1 [file Supplemental%20Table%201_1%20revised%20CLEAN.docx]

Supplementary Table 1: The basic information of patients

|  | Gender | Age (Year) | Tumor localization | Surgical technique | Extent of resection | Histopathologic Findings | Imaging findings |
| --- | --- | --- | --- | --- | --- | --- | --- |
| 1 | Female | 68 | Right parietal lobe | Transparietal craniotomy | Almost total resection (reserved part for a little severe adhesion to functional surface of brain tissue or blood vessels, electrocoagulation for burning, prevention of recurrence) | Right parietal tumor tissue: one pile of grayish white tissue measuring about 3 × 2 × 0.6 cm. | / |
| 2 | Male | 29 | Intraspinal | Posterior midline tumor resection | Almost total resection (reserved part for a little severe adhesion to functional surface of brain tissue or blood vessels, electrocoagulation for burning, prevention of recurrence) | Intraspinal space occupying lesion: a grayish white mass-like tissue, about 5 × 5 × 1 cm in size, which appeared to be encapsulated. | The signal intensity of conus medullaris and cauda equina at L1 – 3 vertebral level was uneven, patchy low signal intensity on T1WI and slightly high signal intensity on T2WI-FS were observed, and no abnormal enhancement was observed on enhanced scan. |
| 3 | Male | 54 | Brainstem | Resection of brainstem tumor via infratemporal approach | Almost total resection (reserved part for a little severe adhesion to functional surface of brain tissue or blood vessels, electrocoagulation for burning, prevention of recurrence) | Brainstem tumors revealed a pile of grayish white viscous and slippery tissue measuring about 5 × 3 × 1 cm, with some areas slightly gelatinous. | / |
| 4 | Female | 4 | Left frontal lobe | Transfrontal tumor resection | Almost total resection (reserved part for a little severe adhesion to functional surface of brain tissue or blood vessels, electrocoagulation for burning, prevention of recurrence) | Space-occupying lesions in the left frontal lobe: a grayish grayish brown mass measuring about 4.5 × 4 × 3 cm, with a slightly lobulated surface, grayish in most areas of the cut surface, and grayish red in the remaining cut surface. | After anaplastic ependymoma surgery, the structure of the surgical area was disordered, the local bone of the frontal bone was discontinuous, the shape of the left frontal lobe was less regular, mass-like T1WI and T2WI isointensity shadows were observed in the left frontal lobe, DWI (b = 1000) showed diffusion-limited hyperintensity shadows, the local ADC map signal of the lesion was slightly reduced, and the boundary was less clear; nodular T1WI and T2WI isointensity shadows were observed behind the lesion, DWI showed diffusion-limited hyperintensity shadows, and the corresponding ADC map signal was reduced. T1WI scan was performed after intravenous injection of Gd-DTPA, and the above lesions showed mass-like and nodular significant abnormal enhancement shadows, measuring about 4.4 cm × 3.4 cm × 3.5 cm and 0.8 cm × 0.7 cm × 1.0 cm. |
| 5 | Female | 48 | Fourth ventricle | Posterior midline approach four-ventricle tumor resection | Almost total resection (reserved part for a little severe adhesion to functional surface of brain tissue or blood vessels, electrocoagulation for burning, prevention of recurrence) | Fourth ventricle tumor: a pile of grayish white fragmented tissue measuring about 1 × 0.8 × 0.2 cm. | The MRS spectral line baseline and signal-to-noise ratio were fair. The normal slope of MRS spectrum disappeared in the main part of the lesion, the Cho peak of MRS spectrum was located at about 3.25 ppm, the Cho peak was significantly increased, and the NAA peak was significantly decreased. The MRS-related parameter ratios in the lesion area were as follows: Cho/Cr = 7.81, Cho/NAA = 1.87. |
| 6 | Female | 8 | Fourth ventricle | Posterior midline approach four-ventricle tumor resection | Almost total resection (reserved part for a little severe adhesion to functional surface of brain tissue or blood vessels, electrocoagulation for burning, prevention of recurrence) | Fourth ventricle tumor: 1 pile of grayish white tissue, about 7 × 6.5 × 2 cm in size, grayish white cut surface, brittle. | A mass space-occupying lesion was observed in the fourth ventricular area, with unclear local demarcation from the right side of cerebellar vermis, about 4.4 cm × 3.4 cm × 6.9 cm in size, slightly low signal intensity on T1WI and slightly high signal intensity on T2WI, isointensity on DWI lesions, uneven signal intensity in the lesion, slightly low signal intensity on patchy T1WI and T2WI, small cystic long T1 and long T2 signals, multiple tortuous flow void signals in the lesion, the lesion descended to the cervical spinal canal, brainstem, medulla oblongata and cerebellar hemispheres were compressed, and patchy heterogeneous enhancement was observed in the above lesions on enhanced scan: the supratentorial ventricular system was enlarged and patchy long T1 and long T2 signal shadows were observed around the lateral ventricles. |
| 7 | Male | 35 | Left frontal lobe | Transfrontal tumor resection | Almost total resection (reserved part for a little severe adhesion to functional surface of brain tissue or blood vessels, electrocoagulation for burning, prevention of recurrence) | Left frontal lobe space occupying lesion: 1 pile of grayish white broken tissue, about 2.5 × 2.5 × 1.3 cm in size, some tissues were spongy. | The left frontal lobe showed patchy low T1WI, high T2WI and slightly high signal intensity, slightly high T2FLAIR signal intensity, linear high signal intensity on DWI (b = 1000), decreased corresponding ADC value signal intensity, lesion size about 3.2 cm × 1.4 cm × 1.8 cm, and large patchy edema signal around the lesion. After intravenous injection of Gd-DTPA contrast medium, the lesion was significantly heterogeneously enhanced. |
| 8 | Male | 5 | Posterior fossa | Transparietal craniotomy | Almost total resection (reserved part for a little severe adhesion to functional surface of brain tissue or blood vessels, electrocoagulation for burning, prevention of recurrence) | Intracranial space-occupying glioma: a pile of grayish grayish grayish white tissue, about 6 × 4.5 × 1.5 cm in size, grayish cut surface, soft. | Irregular mass-like abnormal signal shadows were observed in the posterior fossa, about 3.7 cm × 3.9 cm × 3.6 cm in size, showing equal and long T1 and heterogeneous slightly long T2 signals, T2FLAIR showed slightly high signal intensity, with less uniform signal intensity, small cystic, patchy long T1 and long T2 signals, less clear boundary of the lesion, a small amount of long T1 and long T2 edema signals in the periphery, DWI (b = 1000) showed diffusion-limited high signal intensity in the lesion part, enhanced scan showed heterogeneous significant enhancement, cerebellum and fourth ventricle were compressed and elevated, the brain moved forward by compression, the lesion continued to grow into the right perforation, the local and cerebellar demarcation was less clear, and the supratentorial ventricle was significantly dilated and hydrops. |
| 9 | Female | 47 | Spinal cord | Posterior midline tumor resection | Almost total resection (reserved part for a little severe adhesion to functional surface of brain tissue or blood vessels, electrocoagulation for burning, prevention of recurrence) | C.3 intramedullary mass: 1 pile of grayish red broken tissue, about 1.2 × 1.2 × 0.2 cm. | T1WI scan was performed after intravenous injection of Gd-DTPA. Heterogeneous enhancement was observed in the spinal cord at the level of C3 vertebral body, in which patchy non-enhanced area was observed. The boundary of the lesion was approximately clear, with the size of about 1.1 cm × 1.6 cm × 0.7 cm. Some of them showed slightly high signal intensity on DWI (b = 800). The corresponding ADC map showed no decrease. Cystic long T1 non-enhanced shadow was observed in the upper and lower spinal canals. |
| 10 | Male | 50 | Spinal cord | Posterior midline tumor resection | Almost total resection (reserved part for a little severe adhesion to functional surface of brain tissue or blood vessels, electrocoagulation for burning, prevention of recurrence) | Cervical spinal cord tumor: 1 pile of grayish tissue, about 3.5 × 1.6 × 0.2 cm. | / |
| 11 | Male | 39 | Intraspinal | Posterior midline tumor resection | Almost total resection (reserved part for a little severe adhesion to functional surface of brain tissue or blood vessels, electrocoagulation for burning, prevention of recurrence) | Neural tumor: A grayish nodular mass measuring about 3.5 × 2 × 1.3 cm with smooth surface. | Contrast-enhanced intravenous injection of Gd-DTPA showed that the physiological curvature of the lumbar spine existed, the sequence was fair, some vertebral edges were sharp, mass-like heterogeneous high signal intensity shadows were observed in the spinal canal at the level of the L2-3 vertebral body, DWI showed high signal intensity of the lesion, the corresponding ADC signal was slightly reduced, the boundary of the lesion was clear, the size was about 3.5 cm × 1.7 cm × 1.1 cm, and the adjacent cauda equina was compressed and displaced. |
| 12 | Male | 42 | Parietal lobe | Transparietal craniotomy | Almost total resection (reserved part for a little severe adhesion to functional surface of brain tissue or blood vessels, electrocoagulation for burning, prevention of recurrence) | Parietal lobe: a piece of grayish mass-like tissue, about 5 × 5 × 2 cm in size, grayish red in cut surface, soft. | Abnormal mass signal shadows were observed on the right top, low and isointensity on T1WI, isointensity and hyperintensity on T2WI, about 5.3 cm × 4.3 cm × 6.0 cm in size, isointensity on DWI (b = 1000), patchy long T1 and long T2 edema signal shadows were observed in the adjacent brain tissues of the lesion, patchy cerebrospinal fluid signal shadows were observed in the anteromedial aspect of the lesion, enhanced scan showed heterogeneous significant enhancement, no enhancement of surrounding edema and cerebrospinal fluid signals, compression and displacement of adjacent gyri, lateral ventricle and third ventricle, and left shift of midline structure. |
| 13 | Female | 52 | Intraspinal | Posterior midline tumor resection | Almost total resection (reserved part for a little severe adhesion to functional surface of brain tissue or blood vessels, electrocoagulation for burning, prevention of recurrence) | Lumbosacral intraspinal tumor tissue: 1 pile of grayish red broken tissue, about 3.5 × 2 × 1.2 cm. | After intravenous injection of Gd-DTPA, T1WI scan showed multiple nodular and conglomerate heterogeneous enhancement shadows in the spinal canal behind the level of L2-S1 vertebral body, slightly high signal intensity shadows in the local DWI sequence, no significant decrease in the corresponding ADC values, and less regular local shape of cauda equina. |
| 14 | Male | 32 | Fourth ventricle | Posterior midline approach four-ventricle tumor resection | Almost total resection (reserved part for a little severe adhesion to functional surface of brain tissue or blood vessels, electrocoagulation for burning, prevention of recurrence) | Fourth ventricle tumor: a piece of grayish red tissue, about 3 × 2 × 1.5 cm in size, incision seems to show a cyst, 1 cm in diameter, containing dark red hematoma-like material, and another pile of grayish white broken tissue, about 1.8 × 1.5 × 0.3 cm. | Space-occupying lesions were observed in the fourth ventricular area, with irregular shape and mixed signal intensity, equal, low and high signal intensity on T1WI, equal and high signal intensity on T2WI, patchy low signal intensity locally, enlarged fourth ventricle, molded tumor growth, herniated downward into the foramen magnum, no diffusion restriction high signal intensity on DWI, heterogeneous enhancement on enhanced scan, patchy non-enhanced area, compression and anterior shift of adjacent brainstem, and unclear boundary between the lesion and cerebellar vermis. |
| 15 | Female | 35 | Spinal cord | Posterior midline tumor resection | Almost total resection (reserved part for a little severe adhesion to functional surface of brain tissue or blood vessels, electrocoagulation for burning, prevention of recurrence) | Spinal cord tumor: a piece of grayish red tissue, about 2 × 2 × 0.2 cm. | The sequence of cervical vertebra was complete, the physiological curvature was slightly straightened, the edge of all vertebral bodies was slightly sharpened, the mass-like abnormal moderate enhancement signal shadow was observed in the spinal cord at the level of cervical 4 and 5 vertebral bodies on enhanced scan, no enhanced low signal shadow was observed in the periphery, DWI (high b value) showed slightly high signal intensity, and the lesion size was about 0.7 cm × 1.6 cm × 0.7 cm. |
| 16 | Male | 43 | Spinal cord | Posterior midline tumor resection | Almost total resection (reserved part for a little severe adhesion to functional surface of brain tissue or blood vessels, electrocoagulation for burning, prevention of recurrence) | Intramedullary thoracic tumor: a pile of grayish grayish yellow broken tissue, about 2 × 1.8 × 0.5 cm in size, slightly soft. | Spindle symmetrical enlargement of the spinal cord at the level of T2-3 vertebral body showed unequal T1 and slightly equal T2 signal shadows, T2WI-FS showed heterogeneous slightly high signal intensity, DWI (high b value) showed high signal intensity, the corresponding ADC map signal decreased, the lesion size was about 33 mm × 10 mm × 9 mm, the boundary was clear, the adjacent subarachnoid space was compressed and narrowed, and the enhanced scan showed moderate enhancement. No significant compression changes were observed in the posterior dural sac of the intervertebral disc. |
| 17 | Female | 30 | Intraspinal | Posterior midline tumor resection | Almost total resection (reserved part for a little severe adhesion to functional surface of brain tissue or blood vessels, electrocoagulation for burning, prevention of recurrence) | L1-2 intraspinal mass: 1 pile of grayish grayish red tissue, about 4 × 3 × 1 cm in size. | Abnormal signal shadows were observed in the spinal canal at the level of L1-2 vertebral body, and high signal shadows were observed locally in the DWI sequence. The corresponding ADC values were slightly reduced, and the enhanced scan showed significant heterogeneous enhancement, with a size of about 1.4 cm × 1.8 cm × 3.9 cm. The adjacent spinal cord and cauda equina were compressed and shifted anteriorly. |
| 18 | Male | 39 | Fourth ventricle | Posterior midline approach four-ventricle tumor resection | Almost total resection (reserved part for a little severe adhesion to functional surface of brain tissue or blood vessels, electrocoagulation for burning, prevention of recurrence) | Fourth ventricle tumor revealed a pile of grayish grayish red tissue measuring about 4.5 × 4 × 1.7 cm, and the cut surface was grayish grayish red and moderate in quality. | Postoperative reexamination of the fourth ventricle tumor showed discontinuous occipital bone signal, disorganized structure and uneven signal in the surgical area, strip long T1 and long T2 signal shadows in the corresponding areas, and no significant diffusion restriction in DWI. |
| 19 | Female | 51 | Spinal cord | Posterior midline tumor resection | Almost total resection (reserved part for a little severe adhesion to functional surface of brain tissue or blood vessels, electrocoagulation for burning, prevention of recurrence) | Tumor at L2 vertebral level: 1 pile of grayish grayish red broken tissue, about 1.5 × 1 × 0.2 cm in size. | The lumbar spine sequence was complete, physiological curvature existed, nodular heterogeneous enhanced lesions were observed in the lumbar spinal canal (level of flat L2 vertebral body), about 1.4 cm × 1.8 cm × 1.2 cm in size, DWI (b = 800) showed high signal intensity, the corresponding ADC value signal decreased, and the demarcation from the adjacent cauda equina was less clear. |
| 20 | Female | 51 | Fourth ventricle | Posterior midline approach four-ventricle tumor resection | Almost total resection (reserved part for a little severe adhesion to functional surface of brain tissue or blood vessels, electrocoagulation for burning, prevention of recurrence) | Fourth ventricle tumor tissue: a pile of grayish tissue, about 0.3 × 0.3 × 0.2 cm in size. | Nodular T1WI and T2WI high signal shadows were observed in the cerebellar tonsils behind the medulla oblongata, T2FLAIR showed high signal intensity, and DWI showed no significant diffusion restriction, measuring about 0.7 cm × 1.3 cm × 0.5 cm. |
| 21 | Female | 34 | Spinal cord | Posterior midline tumor resection | Almost total resection (reserved part for a little severe adhesion to functional surface of brain tissue or blood vessels, electrocoagulation for burning, prevention of recurrence) | Cervical spinal cord tumor: a piece of grayish grayish red tissue, about 3 × 2.2 × 1 cm in size, and the cut surface was grayish grayish red slightly soft. | / |
| 22 | Female | 30 | Intraspinal | Posterior midline tumor resection | Almost total resection (reserved part for a little severe adhesion to functional surface of brain tissue or blood vessels, electrocoagulation for burning, prevention of recurrence) | Intraspinal tumor tissue at the level of L3 vertebral body: a piece of grayish grayish red tissue, about 3.3 × 2.5 × 0.5 cm in size, grayish red in section, moderate in quality. | Elliptical T1 slightly high signal intensity shadow was observed in the spinal canal at the level of L3 vertebral body, DWI (high b value) showed high signal intensity, the corresponding ADC map signal intensity was slightly reduced, the edge was clear, the signal intensity was uniform, the boundary was clear, the size was about 3.6 cm × 1.2 cm × 1.8 cm. After intravenous injection of Gd-DTPA contrast agent, the lesion showed significant homogeneous enhancement, and linear enhancement shadow was observed in the other spinal canal. |
| 23 | Female | 54 | Intraspinal | Posterior midline tumor resection | Almost total resection (reserved part for a little severe adhesion to functional surface of brain tissue or blood vessels, electrocoagulation for burning, prevention of recurrence) | Intraspinal schwannoma at the level of L2 vertebral body: 1 pile of grayish white tissue, about 2.3 × 1.5 × 0.4 cm. | Nodular slightly short T1 and slightly long T2 signal shadows were observed in the subdural space of the spinal canal at the upper edge of L2 vertebral body. T2WI-FS showed slightly high signal intensity, about 1.5 cm × 1.0 cm × 0.9 cm in size. DWI showed high signal intensity. The corresponding ADC map showed slightly reduced local signal intensity. The enhanced scan showed mild enhancement. The adjacent cauda equina was compressed and displaced. The remaining lumbar spinal cord showed no significant abnormal signal shadow. |
| 24 | Female | 58 | Intraspinal | Posterior midline tumor resection | Almost total resection (reserved part for a little severe adhesion to functional surface of brain tissue or blood vessels, electrocoagulation for burning, prevention of recurrence) | Space-occupying lesions in the spinal canal at the level of the T12-L1 vertebral body: a piece of grayish white tissue, measuring about 2.9 × 1.4 × 0.7 cm, was incised and the section was grayish grayish red and soft. | / |
| 25 | Female | 30 | Spinal cord | Posterior midline tumor resection | Almost total resection (reserved part for a little severe adhesion to functional surface of brain tissue or blood vessels, electrocoagulation for burning, prevention of recurrence) | Intramedullary cervicothoracic spinal cord tumor: a piece of grayish white tissue, about 3 × 2.5 × 0.7 cm in size. | Thickened spinal cord was observed at C1 to T1, with strip-like isointense and long T1, isointense and long T2 signal shadows. The internal signal intensity was uneven, with the upper and lower range of the lesion of about 4.6 cm. The upper and lower ends of the lesion were thickened and multiple cystic long T1 and long T2 signal shadows were observed, with the upper end reaching the dorsal medulla oblongata. The cervical sequence was complete, the physiological curvature became straight, the edges of all vertebral bodies were smooth, and the signal in the vertebral body was still uniform. T2WISAG showed slightly decreased signal intensity in the cervical discs 2-3, 3-4, 4-5, 5-6 and 6-7, and slightly increased pressure trace in the dural sac at the corresponding level of the cervical disc 5-7. |
| 26 | Male | 20 | Fourth ventricle | Posterior midline approach four-ventricle tumor resection | Almost total resection (reserved part for a little severe adhesion to functional surface of brain tissue or blood vessels, electrocoagulation for burning, prevention of recurrence) | Fourth ventricle tumor tissue: a piece of grayish grayish red tissue measuring about 3.5 × 3 × 1.5 cm. | DWI sequence showed mass-like slightly high signal intensity shadows in the cerebellar vermis and fourth ventricular region, and the local signal intensity of the corresponding ADC map was slightly reduced. |
| 27 | Male | 13 | Intraspinal | Posterior midline tumor resection | Almost total resection (reserved part for a little severe adhesion to functional surface of brain tissue or blood vessels, electrocoagulation for burning, prevention of recurrence) | Ependymoma: A pile of grayish grayish red tissue measuring about 2.5 × 2 × 0.5 cm. | / |
| 28 | Male | 82 | Vermis cerebelli superior | Posterior midline tumor resection | Almost total resection (reserved part for a little severe adhesion to functional surface of brain tissue or blood vessels, electrocoagulation for burning, prevention of recurrence) | Hemangioblastoma of the superior cerebellar vermis: a grayish red mass measuring about 4 × 2.8 × 1.8 cm, partially encapsulated, incised, and the cut surface was grayish red and soft. | Irregular mass-like abnormal signal lesions were observed in cerebellar vermis, showing slightly long T1 and slightly long T2 signals; T2FLAIR showed slightly high signal intensity; dot-like flow empty vascular shadows were observed around and inside the lesion; DWI (b = 1000) showed no obvious diffusion limited high signal intensity; enhanced scan showed significant heterogeneous enhancement; patchy low signal unenhanced area was observed inside, about 3.7 cm × 2.9 cm × 3.0 cm in size, with clear boundary; local expansion of adjacent fourth ventricle. |
| 29 | Male | 41 | Spinal cord | Posterior midline tumor resection | Almost total resection (reserved part for a little severe adhesion to functional surface of brain tissue or blood vessels, electrocoagulation for burning, prevention of recurrence) | Cervical spinal cord tumor: a grayish mass, about 3.7 × 1.7 × 0.7 cm in size, grayish in section, solid and medium in quality. | / |
| 30 | Female | 66 | Intraspinal | Posterior midline tumor resection | Almost total resection (reserved part for a little severe adhesion to functional surface of brain tissue or blood vessels, electrocoagulation for burning, prevention of recurrence) | L2 mass: a piece of grayish slightly grayish red tissue, about 2 × 1 × 0.8 cm in size, was incised, the section was grayish grayish red, soft, and another pile of grayish white tissue was observed, about 2 × 1.5 × 0.3 cm. | After intravenous injection of GDDTPA, T1WI scan was performed. Nodular obvious enhancement shadow was observed in the running area of cauda equina at the level of L2 vertebral body. DWI (b = 1000) showed local high signal intensity shadow. The corresponding ADC map signal decreased, ranging from about 1.7 cm × 1.0 cm × 1.9 cm, with clear boundary. |
| 31 | Female | 67 | Spinal cord | Posterior midline tumor resection | Almost total resection (reserved part for a little severe adhesion to functional surface of brain tissue or blood vessels, electrocoagulation for burning, prevention of recurrence) | Spinal cord tumor: a grayish red mass, about 2.6 × 1.6 × 1 cm in size, with intact capsule, incision, grayish and slightly grayish yellow cut surface, soft. | T1WI scan was performed after intravenous injection of Gd-DTPA: a mass-like iso-T1 signal shadow was observed in the subdural space of the spinal canal behind the L1-2 vertebral body, the enhanced scan showed significant enhancement, the local enhancement was slightly less uniform, DWI (b = 800) showed high signal intensity, the local ADC signal was slightly reduced, ranging from about 1.5 cm × 1.0 cm × 2.7 cm, and the adjacent cauda equina was compressed and displaced. |
| 32 | Male | 45 | Right temporal insula, basal ganglia, corona radiata | Transparietal craniotomy | Almost total resection (reserved part for a little severe adhesion to functional surface of brain tissue or blood vessels, electrocoagulation for burning, prevention of recurrence) | Brain tumor: a pile of grayish grayish red tissue, about 3 × 3 × 0.5 cm. | Mass long T1 and long T2 mixed signals were observed in the right frontoparietal temporal insular-paraventricular region, DWI showed slightly high signal intensity, the corresponding ADC map signal intensity was slightly reduced, the boundary of the lesion was less clear, the enhanced scan showed significant rosette-like heterogeneous enhancement, the enhancement range was about 6.6 cm × 4.5 cm × 4.9 cm, patchy long T1 and long T2 edema signals were observed around the lesion, the right lateral ventricle was compressed and narrowed, the adjacent brain parenchyma was pushed and displaced, and the midline structure was locally shifted to the left. Patchy isometric and slightly long T1 and slightly long T2 signals were observed in bilateral thalamus and left parietal lobe, T2FLAIR showed slightly high signal intensity, the remaining ventricular system showed no significant enlargement, the right cerebellopontine angle cistern was slightly widened, and the fissure and sulcus showed no widening or deepening. (See Appendix: Thickening of posterior wall of nasopharynx) Lesions were selected for analysis, and the baseline of MRS spectral lines was stable and the signal-to-noise ratio was fair. The NAA peak is approximately 2.02 ppm, the Cho peak is approximately 3.21 ppm, and the Cr peak is approximately 3.04 ppm. The NAA peak of the lesion was significantly lower and the Cho peak was significantly higher, and the MRS-related parameter ratios in the lesion area were as follows: Cho/Cr = 4.51, NAA/Cr = 0.57, and Cho/NAA = 7.86. |
